# Supplementary material for: SARS–CoV-2 infection of the placenta
Source: JCI journal article supplement (doi:10.1172/jci139569), 2020-06-23

Supplementary Figure S1: Patient blood smear. Blood smear shows normochromic normocytic red blood cells visualized without evidence of schistocytes or hemolysis. A polymorphic population of atypical lymphocytes were noted (not pictured) and severe thrombocytopenia without evidence of clumping.

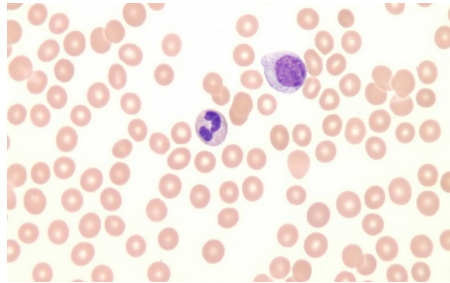

Supplementary Figure S2: Quantification of anti-SARS-CoV-2 antibodies in maternal plasma. (A) Plot of ELISA optical densities (ODs) for IgM and IgG responses to the SARS-CoV-2 S1 spike protein from plasma samples of 56 COVID-19<sup>+</sup> patients admitted to the Yale New Haven Hospital and 24 uninfected healthcare workers (HCW). All samples were assayed at a 1:50 dilution. The case study subject is indicated as patient 31. Dashed lines indicate the mean OD of the HCW cohort plus 2.5 standard deviations (SD). (B) Endpoint dilution titers of IgM and (C) IgG for the case study patient. The 99% confidence cut-off limit is depicted with a dashed line. The endpoint titer for IgM was 1:1,600 and 1:25,600 for IgG.

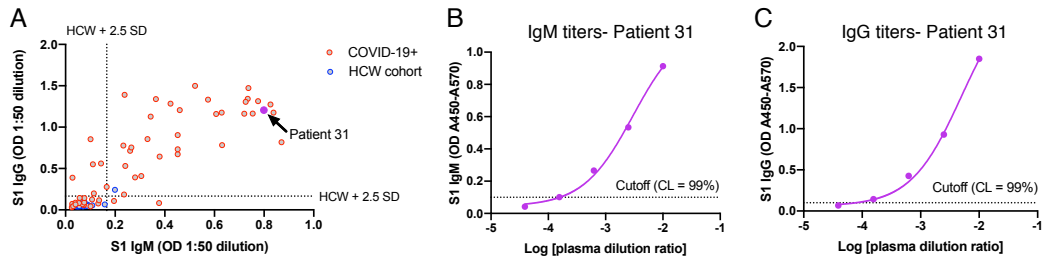

Supplementary Figure S3. Placenta from COVID-19 uninfected pregnancy. A. Immunohistochemistry for anti-SARS-CoV-2 (negative control). B. In situ hybridization for SARS-CoV-2 RNA (negative control).

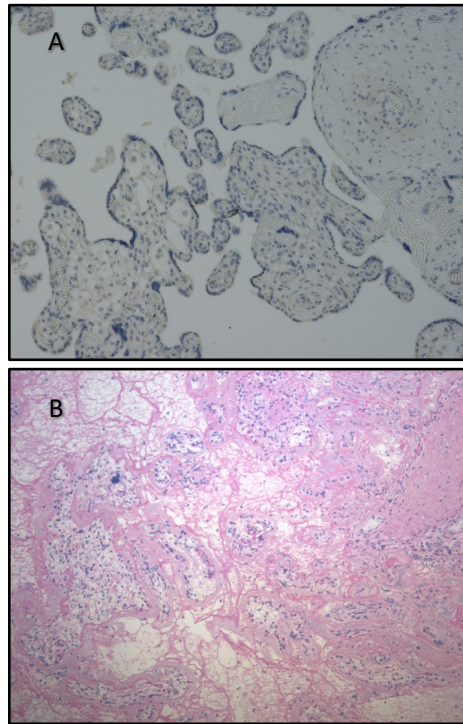

Supplementary Figure S4: Fetal organ histology. H&E stain of fetal (A) lung, (B) myocardium, (C) liver, (D) kidney, and (E) spleen show normal histology without inflammatory changes.

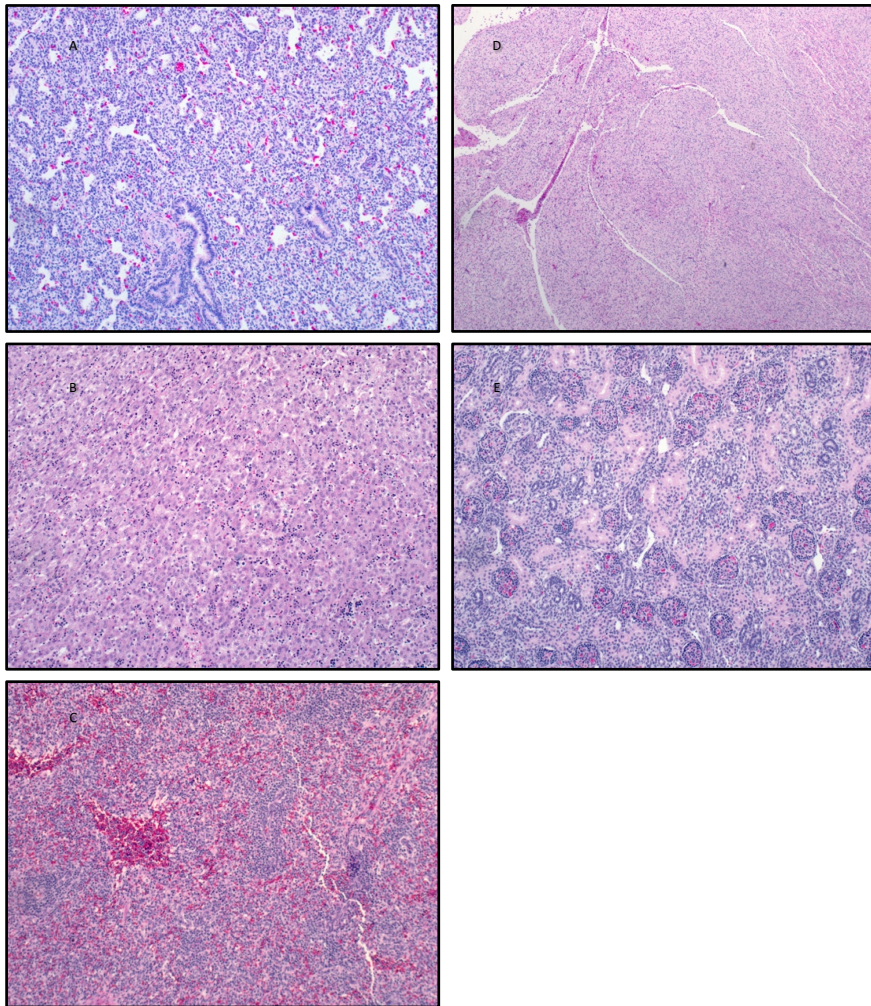

Supplementary Table I: Patient's serial laboratory results from presentation to post-operative day 3.

| Table 1. Serial Laboratory Results         |           |           |            |            |            |            |            |            |                                 |
|--------------------------------------------|-----------|-----------|------------|------------|------------|------------|------------|------------|---------------------------------|
|                                            | Hour<br>0 | Hour<br>7 | Hour<br>18 | Hour<br>21 | Hour<br>29 | Hour<br>35 | Hour<br>50 | Hour<br>74 | Hospital<br>Reference<br>Values |
| <b>Hematologic</b>                         |           |           |            |            |            |            |            |            |                                 |
| Haptoglobin (mg/dL)                        |           | 65        |            |            |            |            |            |            | 30-200                          |
| Hemoglobin (g/dL)                          | 16        | 14.7      | 12.2       | 11         | 11.7       | 10.8       | 10.6       | 10.9       | 12-18                           |
| Hematocrit (%)                             | 46.2      | 43.2      | 36.1       | 32.9       | 34.6       | 32.5       | 32.2       | 31.9       | 37-52                           |
| Platelets (x1000/ $\mu$ L)                 | 36        | 33        | 35         | 28         | 33         | 44         | 58         | 94         | 140-440                         |
| Immature Platelet Fraction (%)             |           | 7.9       |            | 4.9        | 4.3        | 3.4        | 3.4        |            | 0.8-9.4                         |
| White Blood Cell (x1000/ $\mu$ L)          | 5.5       | 5.7       | 6.1        | 4.9        | 4.8        | 4.5        | 3.4        | 3.7        | 4.0-10.0                        |
| Absolute Lymphocyte Count (x1000/ $\mu$ L) | 2.7       |           | 3.1        | 2.5        | 3.4        | 2.4        | 1.9        | 1.7        | 1.0-4.0                         |
| Lymphocytes (%)                            | 48.5      | 31        | 51.2       | 51.3       | 56.3       | 53.8       | 53.9       | 45         | 8.0-49.0                        |
| <b>Coagulation</b>                         |           |           |            |            |            |            |            |            |                                 |
| D-Dimer (mg/L FEU)                         |           |           |            | >33.89     |            | 3.55       | 0.87       | 0.51       | <0.5                            |
| Fibrinogen (mg/dL)                         |           | <60       |            | 229        | 229        | 233        | 237        | 275        | 136-464                         |
| Partial thromboplastin time (seconds)      |           | 44.6      |            | 31.7       | 30.4       | 29.7       | 31.6       | 27.7       | 22.1-30.1                       |
| Prothrombin time (seconds)                 |           | 12.7      |            | 10.1       | 9.9        | 9.9        | 9.7        | 9.6        | 9.6-12.4                        |
| <b>Blood chemical constituents</b>         |           |           |            |            |            |            |            |            |                                 |
| Alanine Aminotransferase (U/L)             | 68        | 68        | 55         | 46         | 47         | 45         | 47         | 51         | 6-34                            |
| Aspartate Aminotransferase (U/L)           | 104       | 105       | 83         | 77         | 91         | 75         | --         | 66         | 11-33                           |
| Bilirubin, total (mg/dL)                   | 0.9       | 0.4       | 0.6        | 1          | 0.4        | 0.4        | 0.3        | 0.3        | <1.2                            |
| Creatinine (mg/dL)                         | 0.6       | 0.54      | 0.43       | 0.46       | 0.49       | 0.52       | 0.49       | 0.54       | 0.4-1.3                         |
| LDH (U/L)                                  | 527       | 507       |            |            | 477        | 422        |            | 317        | 122-241                         |
| <b>Urine</b>                               |           |           |            |            |            |            |            |            |                                 |
| Protein/Creatinine Ratio (mg/mg)           |           | 0.47      |            |            | 0.7        |            |            |            | <0.10                           |
| <b>Inflammatory mediators</b>              |           |           |            |            |            |            |            |            |                                 |
| Ferritin (ng/mL)                           |           | 321       | 321        | 320        |            | 338        | 348        | 312        | 13-150                          |
| C-reactive protein (mg/L)                  | 38        | 34.6      |            | 33.7       |            | 52.9       | 41.7       | 9.8        | >10                             |
| Interleukin-2 (pg/mL)                      |           | <5        |            | 9          |            |            |            |            | <12                             |
| Interleukin-2-receptor (pg/mL)             |           | 1780      |            | 1411       |            |            |            |            | <1033                           |
| Interleukin-6 (pg/mL)                      |           | <5        |            | 11         |            |            |            |            | <5                              |
| Interleukin-10 (pg/mL)                     |           | 113       |            | 23         |            |            |            |            | <18                             |
| Procalcitonin (ng/mL)                      |           | 0.18      |            | 0.17       |            | 0.15       | 0.1        | 0.07       | >0.5                            |
| <b>Cardiac Function</b>                    |           |           |            |            |            |            |            |            |                                 |
| B-Type Natriuretic peptide (pg/mL)         |           | <50       |            |            |            |            |            |            | <125                            |
| Troponin T (ng/mL)                         |           | <0.01     |            | <0.01      |            | <0.01      |            | <0.01      | <0.01                           |

Supplementary Figure S1: Patient blood smear. Blood smear shows normochromic normocytic red blood cells visualized without evidence of schistocytes or hemolysis. A polymorphic population of atypical lymphocytes were noted (not pictured) and severe thrombocytopenia without evidence of clumping.



Supplementary Figure S2: Quantification of anti-SARS-CoV-2 antibodies in maternal plasma. (A) Plot of ELISA optical densities (ODs) for IgM and IgG responses to the SARS-CoV-2 S1 spike protein from plasma samples of 56 COVID-19<sup>+</sup> patients admitted to the Yale New Haven Hospital and 24 uninfected healthcare workers (HCW). All samples were assayed at a 1:50 dilution. The case study subject is indicated as patient 31. Dashed lines indicate the mean OD of the HCW cohort plus 2.5 standard deviations (SD). (B) Endpoint dilution titers of IgM and (C) IgG for the case study patient. The 99% confidence cut-off limit is depicted with a dashed line. The endpoint titer for IgM was 1:1,600 and 1:25,600 for IgG.



Supplementary Figure S3. Placenta from COVID-19 uninfected pregnancy. A. Immunohistochemistry for anti-SARS-CoV-2 (negative control). B. In situ hybridization for SARS-CoV-2 RNA (negative control).



Supplementary Figure S4: Fetal organ histology. H&E stain of fetal (A) lung, (B) myocardium, (C) liver, (D) kidney, and (E) spleen show normal histology without inflammatory changes.



Supplement: sd1 [file 1]
